# Supplementary material for: A vacuole-like compartment concentrates a disordered calcium phase in a key coccolithophorid alga
Source: PubMed Central journal article supplement (PMC4834641; doi:10.1038/ncomms11228), 2016-04-14
Supplement: ncomms11228-s1.pdf [file ncomms11228-s1.pdf]

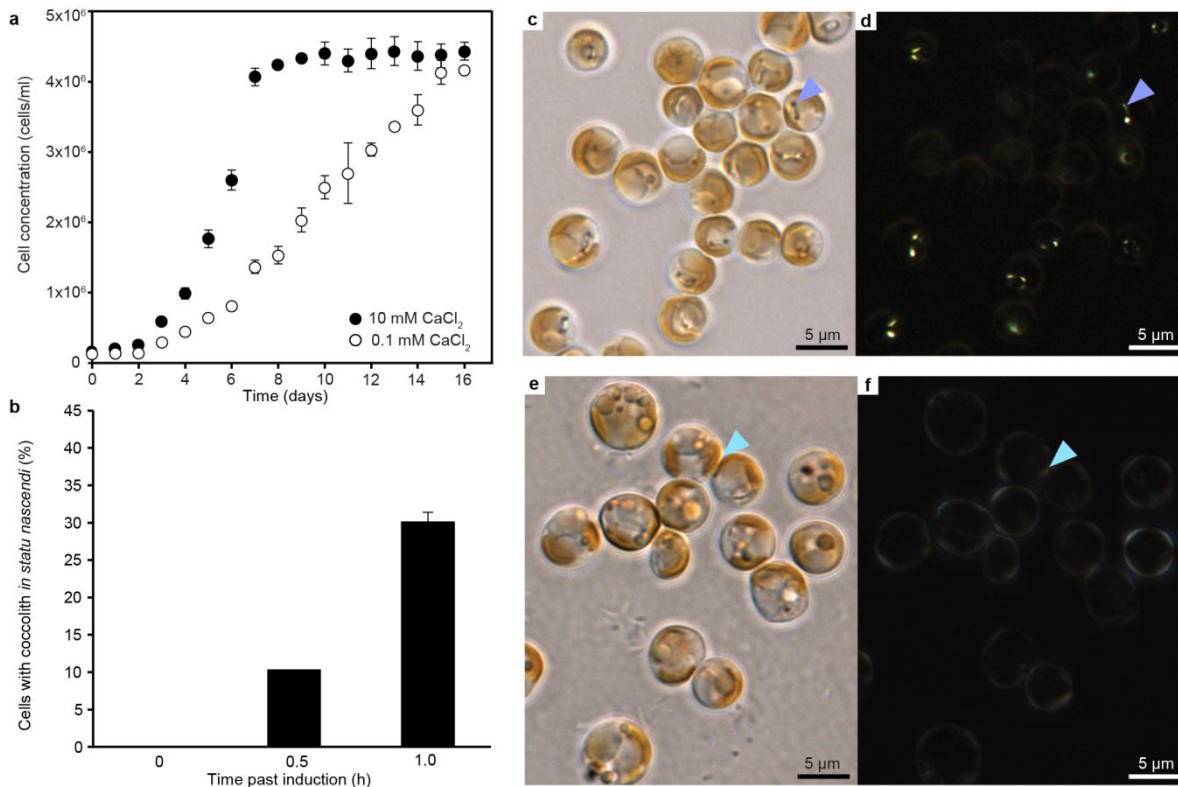

1 **Supplementary Figure 1 | Turning coccolith formation 'on' and 'off'.** (a) Growth  
 2 behavior of *Emiliania huxleyi* in standard (10 mM CaCl<sub>2</sub>) and calcium-depleted (0.1 mM  
 3 CaCl<sub>2</sub>) artificial seawater. The values are the mean of triplicate samples, and the bar  
 4 indicates the standard error. (b) Plot showing the proportion of cells with an intracellular  
 5 coccolith at different time points after induction of coccolith formation in calcium-depleted  
 6 *E. huxleyi*. Bar graphs showing mean±s.d. of triplicate experiments with >500 cells in each  
 7 experiment analyzed. (c,d) Light micrographs of EDTA-decalcified *E. huxleyi* cells.  
 8 Arrowhead points to an intracellular coccolith and indicate the same position in the bright-  
 9 field (c) and the cross-polarized light (d) image. Note that in cross-polarized light imaging  
 10 contrast is related to birefringent material such as calcite. (e,f) Light micrographs of *E.*  
 11 *huxleyi* cells grown for two weeks in calcium-depleted medium, which turns coccolith  
 12 formation 'off'. Arrowhead indicates the same position in the bright-field (e) and the cross-  
 13 polarized light (f) image.

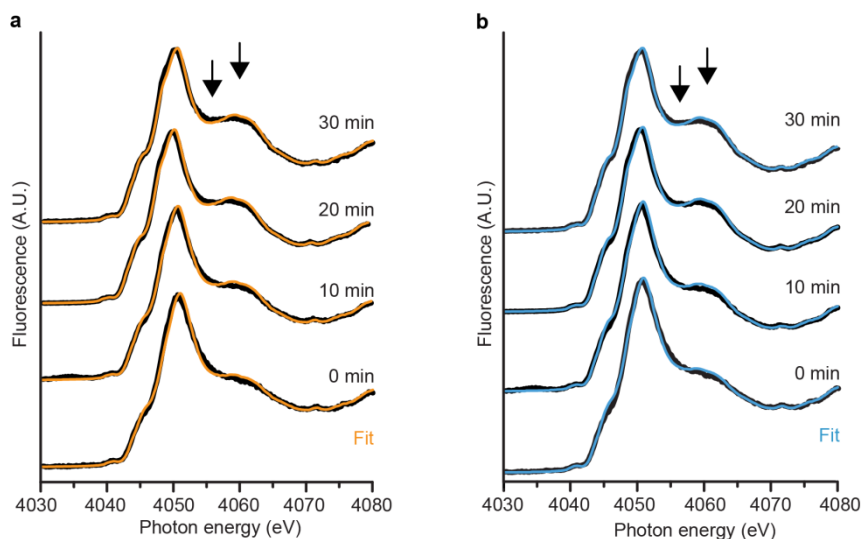

14 **Supplementary Figure 2 | Speciation of cellular calcium during the early stages of**  
 15 **coccolith formation in *E. huxleyi*.** Time-resolved evolution of the XANES spectra (black)  
 16 of cells induced to form calcite and of the calculated fits using linear combinations of (a)  
 17 the two reference standards (orange), coccolith calcite and free calcium ions, and (b)  
 18 the three reference standards (blue), coccolith calcite, free calcium ions, and amorphous  
 19 calcium phosphate. Arrows point to regions of highest divergence between fit and  
 20 measured data.

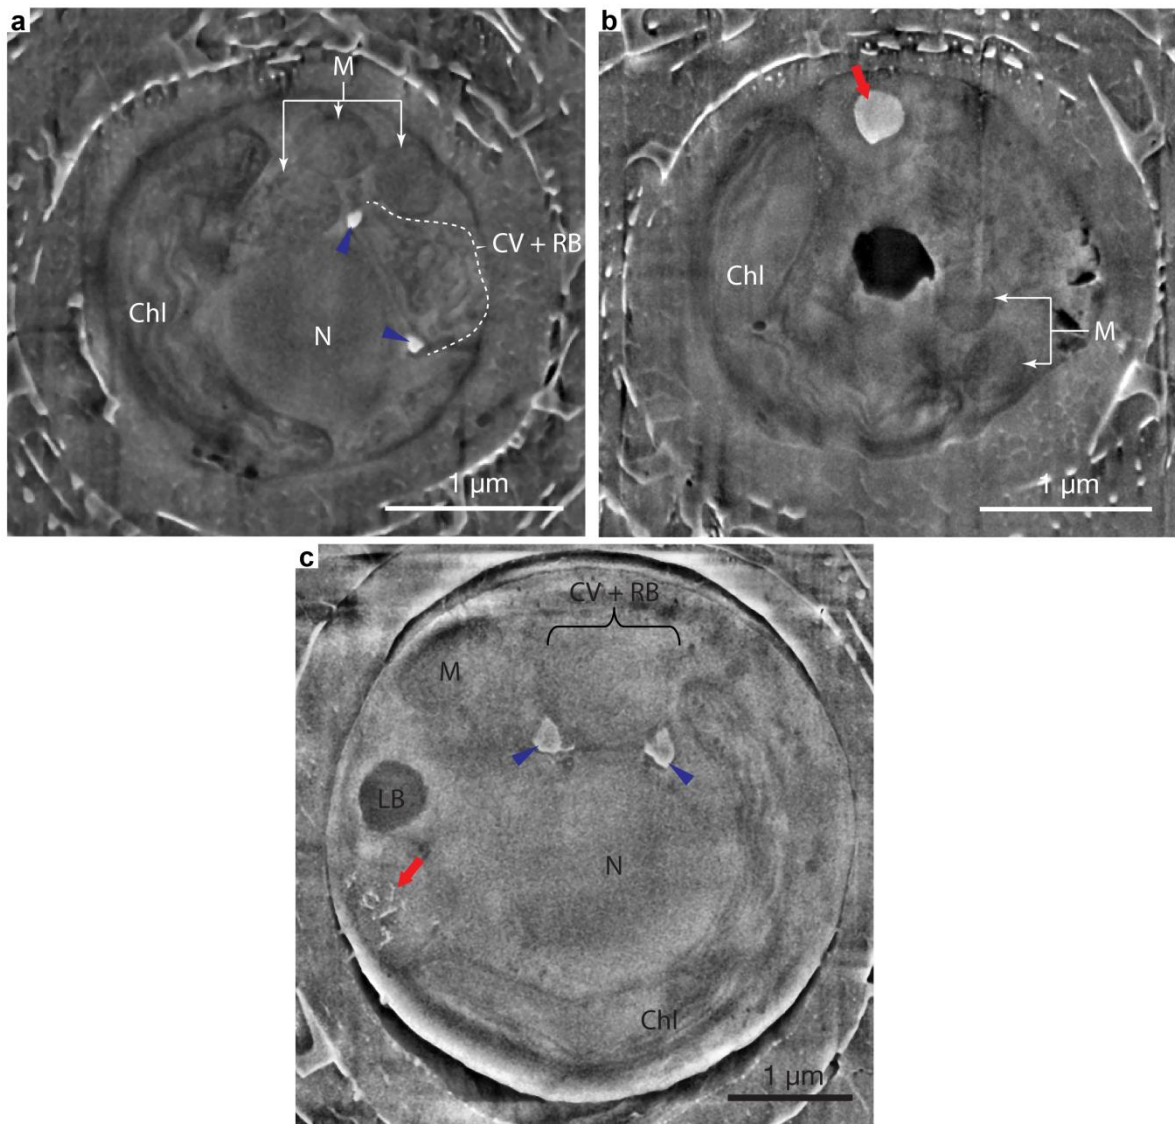

21 **Supplementary Figure 3 | Cryo FIB SEM imaging of vitrified *E. huxleyi* cells.** 2D-  
 22 slices from two cells ((a,b) cell 1; (c) cell 2) acquired with the In-lens secondary electron  
 23 detector showing a cross-section of the coccolith *in statu nascendi* (blue arrowheads), a  
 24 cross-section of the coccolith vesicle (CV) – reticular body (RB), a pool of diluted  
 25 concentrations of calcium (red arrow), a lipid body (LB), nucleus (N), chloroplast (Chl),  
 26 and mitochondria (M).

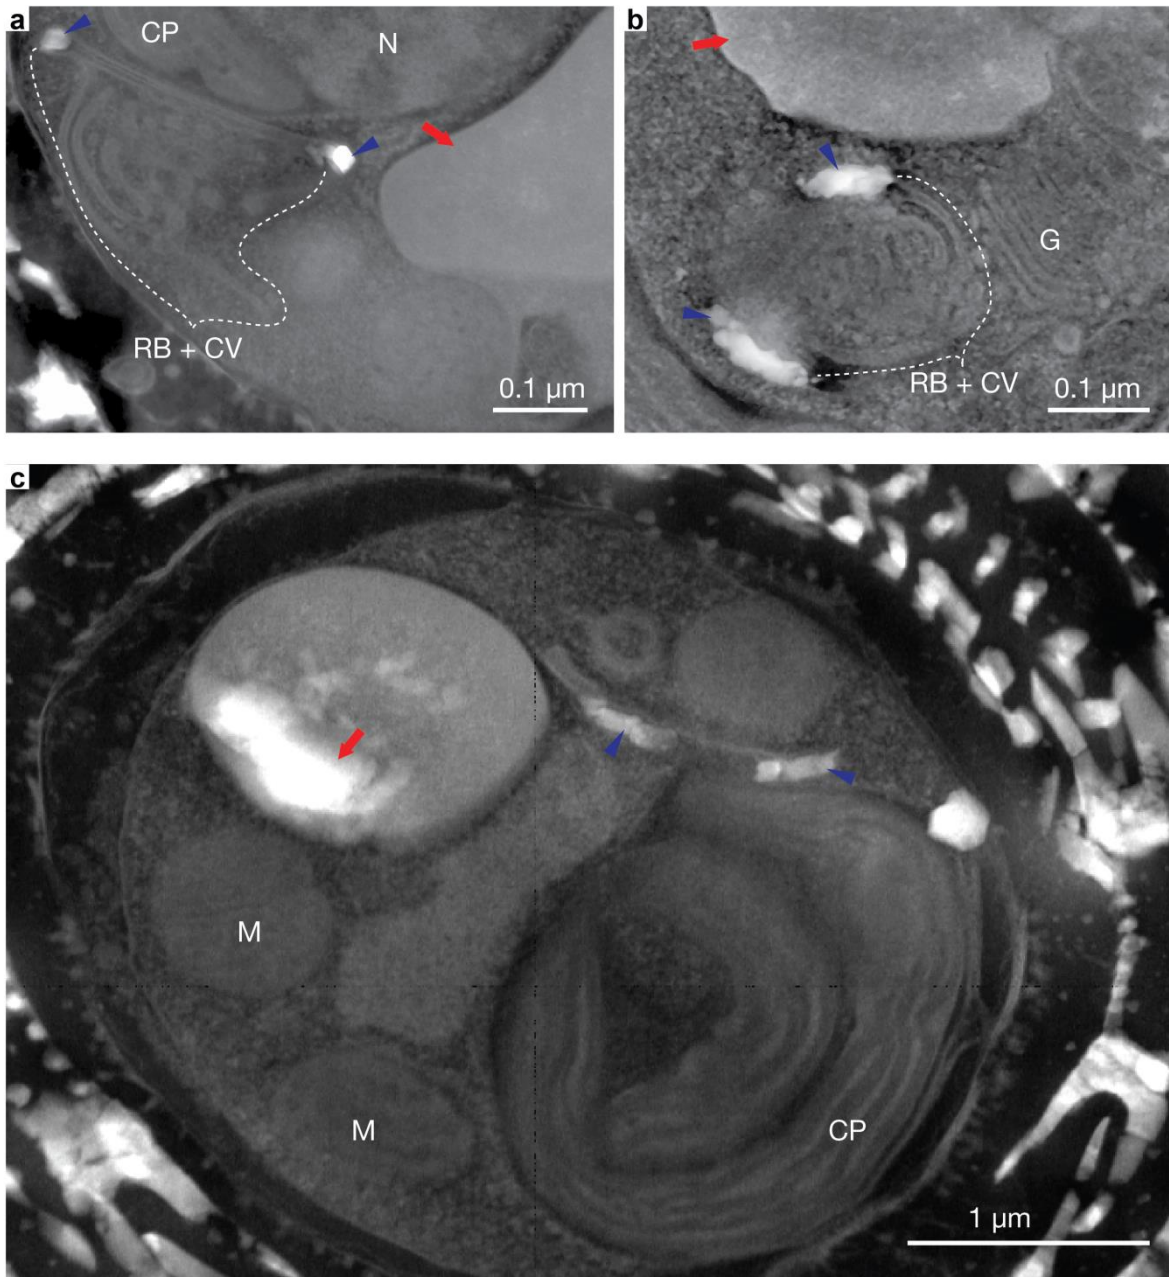

27

28 **Supplementary Figure 4 | Ultrastructural features in unstained cell sections of *E.***  
 29 ***huxleyi*.** HAADF-STEM images of thin-sectioned cells showing a cross-section of the  
 30 coccolith *in statu nascendi* (blue arrowheads), a cross-section of the coccolith vesicle (CV)  
 31 – reticular body (RB), a pool of densely concentrated calcium (red arrow), the Golgi  
 32 apparatus (G), nucleus (N), chloroplast (CP), and mitochondria (M).

33 **Supplementary Table 1 | Quantities of calcium and phosphorus in calcium-rich bodies**  
 34 **calculated from the EDX data set of five cells**

35

|        | <b>Element</b> | <b>Weight %</b> | <b>Atomic %</b> | <b>Uncertainty %</b> | <b>P/Ca ratio</b> |
|--------|----------------|-----------------|-----------------|----------------------|-------------------|
| Cell 1 | P(K)           | 63.17           | 66.3            | 1.06                 | 2.76              |
|        | Ca(K)          | 29.54           | 23.96           | 0.71                 |                   |
| Cell 2 | P(K)           | 31.60           | 29.18           | 1.03                 | 1.83              |
|        | Ca(K)          | 22.37           | 15.97           | 0.84                 |                   |
| Cell 3 | P(K)           | 59.46           | 62.3            | 1.39                 | 2.65              |
|        | Ca(K)          | 29.07           | 23.53           | 0.92                 |                   |
| Cell 4 | P(K)           | 60.08           | 59.88           | 1.63                 | 3.49              |
|        | Ca(K)          | 22.26           | 17.15           | 1.06                 |                   |
| Cell 5 | P(K)           | 53.44           | 55.76           | 0.67                 | 2.22              |
|        | Ca(K)          | 31.20           | 25.16           | 0.46                 |                   |

36 The quantities of calcium and phosphorus were determined from the equation:

37  $C_A/C_B = K_{AB} * (I_A/I_B)$  where C stands for the concentration and I for the intensity of the

38 components A and B, using the Tecnai imaging and analysis software TAI.
